# Supplementary material for: Understanding Antibiotic Usage on Small-Scale Dairy Farms in the Indian States of Assam and Haryana Using a Mixed-Methods Approach—Outcomes and Challenges
Source: MDPI journal article supplement (doi:10.3390/antibiotics10091124), 2021-09-18
Supplement: s1 [file s1]

Questionnaire number:

## Questionnaire

### 1. Name and address of the respondent **NB: must be responsible for bovine health decisions**

|     |                     |  |     |            |  |
|-----|---------------------|--|-----|------------|--|
| 1.1 | Name of interviewer |  | 1.2 | Date       |  |
| 1.3 | North               |  | 1.4 | East       |  |
| 1.5 | Name of the HH head |  | 1.6 | Phone no.  |  |
| 1.7 | Village/Ward        |  | 1.8 | Block/Town |  |

### 2. Basic demography & farm details

|     |                                                                                                          |  |     |                  |  |
|-----|----------------------------------------------------------------------------------------------------------|--|-----|------------------|--|
| 2.1 | Gender of respondent (1=male, 2=female)                                                                  |  | 2.2 | No of HH members |  |
| 2.3 | Highest education (0= No education, 1=primary, 2=class 5-10, 3=Higher secondary, 4=Graduation and above) |  | 2.4 | Age (years)      |  |

|       |                                                                                            |  |
|-------|--------------------------------------------------------------------------------------------|--|
| 2.5   | Have any member of your family ever availed training on livestock management (Yes=1, No=0) |  |
| 2.6   | Did you ever receive training on animal disease? (1=Yes, 0=no)                             |  |
| 2.6.1 | If yes, who gave it?                                                                       |  |
| 2.6.2 | If yes, did you learn about giving medicines to animals?                                   |  |
| 2.6.3 | Do you hand milk or use machine? (Hand milking =1, machine milking =2)                     |  |

### 3. Herd size

| Sl. No. | Species | milking | dry cows/ buffalo cows | adult bulls/bullock | heifer | Calves |
|---------|---------|---------|------------------------|---------------------|--------|--------|
| 3.1     | Cattle  |         |                        |                     |        |        |
| 3.2     | Buffalo |         |                        |                     |        |        |

### 4. Picture card

|     |                                                         | Product a | Product b | Product c | Product d | Product e |
|-----|---------------------------------------------------------|-----------|-----------|-----------|-----------|-----------|
| 4.1 | Do you recognize this medicine? (1=Yes, 0=no)           |           |           |           |           |           |
| 4.2 | What is its name?                                       |           |           |           |           |           |
| 4.3 | Did your cows have this medicine in the last 12 months? |           |           |           |           |           |
| 4.4 | For which reason was it used?                           |           |           |           |           |           |

### 5. Knowledge and practice on antibiotic use

|     |                                                     |  |
|-----|-----------------------------------------------------|--|
| 5.1 | Have you heard about antibiotics? (1=Yes, 0=no)     |  |
| 5.2 | <b>If yes,</b> Please describe what antibiotics do: |  |
| 5.3 | Have you heard of withdrawal period (1=Yes, 0=no)   |  |

Questionnaire number:

|     |                                                                                                                                                                                                            |  |
|-----|------------------------------------------------------------------------------------------------------------------------------------------------------------------------------------------------------------|--|
| 5.4 | <b>If yes,</b> Please describe it :                                                                                                                                                                        |  |
| 5.5 | When do you stop treating an animal with a medicine?<br>(1= when I see it is recovering OR looks healthy<br>2= Continue as long as veterinary says      3= When I don't have more money/medicine to treat) |  |
| 5.6 | Where are medicines discarded?<br>(0= throw away outside 1= garbage bin 2= Return to seller 3= burn 4= Bury<br>5= drain 6= don't bother 7= others:_____)                                                   |  |

## 6. Knowledge and attitude towards antibiotic use

|      |                                                                                                                  |                                          |
|------|------------------------------------------------------------------------------------------------------------------|------------------------------------------|
|      | Do you agree with the following:<br>If farmer has not heard about antibiotics use medicine instead of antibiotic | agree=1,<br>disagree=0/<br>Don't know=99 |
| 6.1  | The more an antibiotic / medicine costs, the better it is                                                        |                                          |
| 6.2  | All antibiotic/medicine suitable for people can be used in animals                                               |                                          |
| 6.3  | If the milk from a treated cow looks normal it is ok to consume                                                  |                                          |
| 6.4  | The pharmacist is as good as the vet to decide which antibiotic/medicine                                         |                                          |
| 6.5  | All diseases need treatment                                                                                      |                                          |
| 6.6  | Injections are always more powerful than oral antibiotic/medicine                                                |                                          |
| 6.7  | There are many poor quality antibiotic/medicine in the market                                                    |                                          |
| 6.8  | Increasing the amount of antibiotic/medicine will make it more effective                                         |                                          |
| 6.9  | Antibiotics stop all diseases                                                                                    |                                          |
| 6.10 | If one cow is sick, then others should be treated also to prevent disease                                        |                                          |
| 6.11 | Antibiotics can cure foot and mouth disease                                                                      |                                          |
| 6.12 | If using antibiotic too often, it may stop being effective                                                       |                                          |

## 7. Medical treatments

|     |                                                                                                                                                                                                                         |                                                                                                               |
|-----|-------------------------------------------------------------------------------------------------------------------------------------------------------------------------------------------------------------------------|---------------------------------------------------------------------------------------------------------------|
| 7.1 | When you treat your animals with medicines, what do you do with the milk during those days?<br>1. Sell      2. Throw away      3. Keep in the household for consumption<br>4. Offer to calves 5. Others, specify: _____ |                                                                                                               |
| 7.2 | What do you do with the milk of a sick animal which is not treated?<br>1. Sell      2. Throw away      3. Keep in the household for consumption      4. Offer to calves<br>5. Others, specify: _____                    |                                                                                                               |
| 7.3 | How often do you have veterinary consultations?                                                                                                                                                                         | 0=Never, 1= weekly (more than once per week), 2=monthly (more than once per month), 3= yearly, 4= more seldom |

Questionnaire number:

### 8 Cattle illness in the preceding 12 months

| Sl.No                                                                     | Disease/ symptom/ condition                              | How many animals got this last 12 months? 99= don't know, 0= No animals | Trend in last 12 months from previous years<br>1= More this year; 2= less this year; 3= no change | How many animals got treated with medicine last 12 months?<br>99= don't know, 0= No animals | Name of medicine or type of medicine given for this last time cattle got sick. |
|---------------------------------------------------------------------------|----------------------------------------------------------|-------------------------------------------------------------------------|---------------------------------------------------------------------------------------------------|---------------------------------------------------------------------------------------------|--------------------------------------------------------------------------------|
| 8.1                                                                       | Mastitis                                                 |                                                                         |                                                                                                   |                                                                                             |                                                                                |
| 8.2                                                                       | Respiratory                                              |                                                                         |                                                                                                   |                                                                                             |                                                                                |
| 8.3                                                                       | Diarrhea                                                 |                                                                         |                                                                                                   |                                                                                             |                                                                                |
| 8.4                                                                       | Lameness                                                 |                                                                         |                                                                                                   |                                                                                             |                                                                                |
| 8.5                                                                       | Fever                                                    |                                                                         |                                                                                                   |                                                                                             |                                                                                |
| 8.6                                                                       | abnormal vaginal discharge (pus, strange color or odour) |                                                                         |                                                                                                   |                                                                                             |                                                                                |
| 8.7                                                                       | Repeat breeding                                          |                                                                         |                                                                                                   |                                                                                             |                                                                                |
| 8.8                                                                       | Abortion                                                 |                                                                         |                                                                                                   |                                                                                             |                                                                                |
| 8.9                                                                       | Retention of placenta                                    |                                                                         |                                                                                                   |                                                                                             |                                                                                |
| 8.10                                                                      | Still birth                                              |                                                                         |                                                                                                   |                                                                                             |                                                                                |
| 8.11                                                                      | Male infertility                                         |                                                                         |                                                                                                   |                                                                                             |                                                                                |
| 8.12                                                                      | Carpal hygroma                                           |                                                                         |                                                                                                   |                                                                                             |                                                                                |
| 8.13                                                                      | Any other specific disease you want to mention:          |                                                                         |                                                                                                   |                                                                                             |                                                                                |
| 8.14 Did any cow have an allergic reaction after treatment? (1=Yes, 0=no) |                                                          |                                                                         |                                                                                                   |                                                                                             |                                                                                |
| 8.15 <u>If yes</u> , How many last 12 months?                             |                                                          |                                                                         |                                                                                                   |                                                                                             |                                                                                |

Questionnaire number:

**Observation check list**

**9 Farming system details**

|     | Parameters                                                                                                                                                                                 | Response |
|-----|--------------------------------------------------------------------------------------------------------------------------------------------------------------------------------------------|----------|
| 9.1 | Floor type (0=Bricks, 1=concrete, 2= Earthen, 3= other (specify))                                                                                                                          |          |
| 9.2 | Cleanliness of farm house (1 = very, 2 =some, 3 = dirty)                                                                                                                                   |          |
| 9.3 | Roof: 1= Pakka/concrete slab                      2= Thatched roof   3= corrugated tin/asbestos, 4= traditional roofing tiles, 5= concrete tiles, 6= bamboo corrugated sheet 7= other..... |          |
| 9.4 | Separate houses for: 1= calves, 2= Pregnant, 3= Sick (Multiple options allowed)                                                                                                            |          |
| 9.5 | Cleanliness of cows (1=very, 2=some, 3=not)                                                                                                                                                |          |
| 9.6 | Medicine storage (0= no storage 1=Open and used packages stored, 2=sealed cabinet, 3=exposed to sun, 4= nothing specific, 5= store house/cattle shed) Multiple options allowed             |          |
| 9.7 | Are there discarded medicines, wrappers, syringes on farm premises (1=yes, 0=no)                                                                                                           |          |

10. Medicine list: **Make a list of all the medicines on the farm including any medicated food and discarded packages Containing antibiotics. If unsure, list it.**

| Medicine name | Quantity | Expiry date | open/closed package | What farmer uses for | How much used in last 12 months | Where or from whom did you buy this pack? |
|---------------|----------|-------------|---------------------|----------------------|---------------------------------|-------------------------------------------|
|               |          |             |                     |                      |                                 |                                           |
|               |          |             |                     |                      |                                 |                                           |
|               |          |             |                     |                      |                                 |                                           |
|               |          |             |                     |                      |                                 |                                           |
